P598

## T1 mapping and myocardial extracellular volume assessed by cardiac magnetic resonance in diabetic patients with stable coronary artery disease

G.A.B. Boros, W. Hueb, P.C. Rezende, F.F. Ribas, A.R. Dallazen, M.O.L. Ribeiro, R.M.R. Garcia, C.L. Garzillo, E.G. Lima, T. Morais, C.H. Nomura, C.E. Rochitte, C.V. Serrano Junior, J.A.F. Ramires, R. Kalil Filho

*Instituto do Coracao InCor Hospital das Clinicas Faculdade de Medicina Universidade de Sao Paulo SP, Sao Paulo, Brazil*

**Background:** T1 mapping is a quantitative technique of cardiac magnetic resonance (CMR) increasingly used for characterization of the myocardium. Type 2 diabetes mellitus (T2DM) may impact myocardial tissue structure, however studies that assessed this association using non-invasive methods have conflicting results.

**Purpose:** We sought to compare the tissue characteristics of the non-infarcted myocardium of patients with and without diabetes with multivessel CAD.

**Methods:** Patients with stable multivessel CAD and preserved left ventricular ejection fraction (LVEF), included in the MASS V trial, underwent contrast-enhanced CMR before revascularization procedures. Patients were stratified according to the T2DM diagnosis at baseline. Values of myocardial native T1, post-contrast T1 and extracellular volume fraction (ECV) were compared between diabetic and non-diabetic patients. Only myocardial tissue without late gadolinium enhancement were assessed.

**Results:** Of 155 patients studied, 67 (43%) were diabetic and 88 (57%) non-diabetic. Baseline characteristics were similar between groups (age  $70\pm 10$  vs  $69\pm 11$ ; 69% vs 68% males; LVEF  $65\pm 13$  vs  $67\pm 9$ ). Mean Syntax score was  $21.2\pm 8.5$  and  $20.4\pm 8.5$  ( $p=0.52$ ) in diabetic and non-diabetic, respectively. Myocardial native T1 values showed no difference in diabetic and non-diabetic ( $1013\pm 67.9$  vs  $1015\pm 61.4$ ,  $p=0.72$ ). However, in diabetic patients values of post-contrast T1 were significantly lower ( $482.2\pm 43.8$  vs  $499.4\pm 47.2$ ,  $p=0.024$ ) and ECV were higher ( $29.62\pm 6.61$  vs  $27.08\pm 4.22$ ,  $p=0.004$ ). Multivariable analyses adjusted for age, sex, BMI, hypertension and Syntax score showed no differences in the results.

**Conclusion:** In this study, T2DM was associated with higher ECV and lower post-contrast T1 values in the myocardial tissue. These findings suggest an increase in the myocardial interstitial matrix in patients with diabetes and stable multivessel CAD.

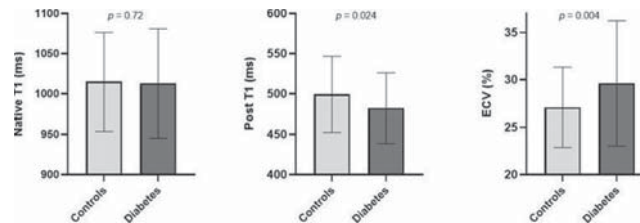

Figure 1
